# Supplementary material for: ALG3 contributes to stemness and radioresistance through regulating glycosylation of TGF-β receptor II in breast cancer
Source: PubMed Central journal article supplement (PMC8086123; doi:10.1186/s13046-021-01932-8), 2021-04-30

**Fig. S5**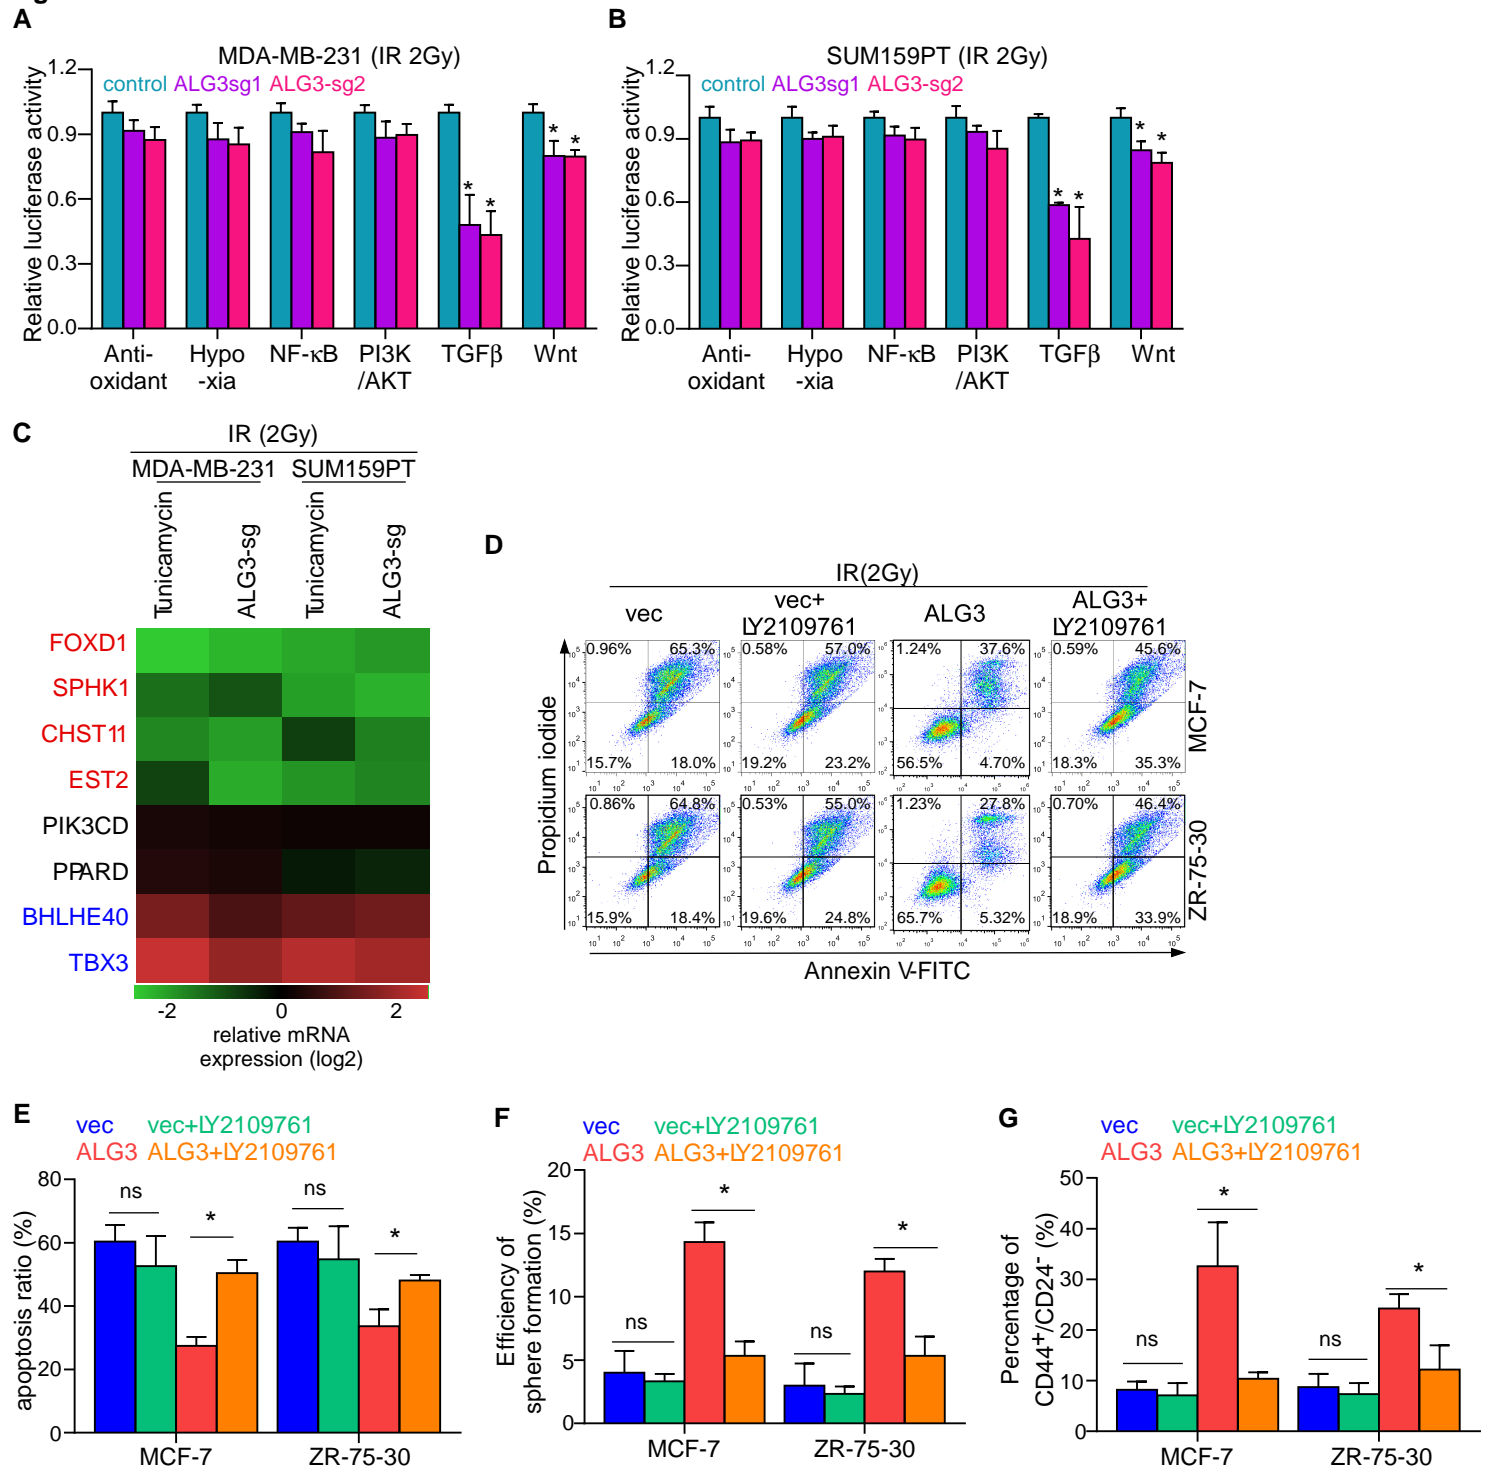

Supplement: 13046_2021_1932_MOESM5_ESM.pdf [file 13046_2021_1932_MOESM5_ESM.pdf]
